# Supplementary material for: The role of metallothionein-3 in streptozotocin-induced beta-islet cell death and diabetes in mice
Source: Royal Society of Chemistry journal article supplement (doi:10.1039/c4mt00143e), 2014-07-16
Supplement: c4mt00143e1.pdf [file c4mt00143e1.pdf]

**Supplementary Figure 1.**

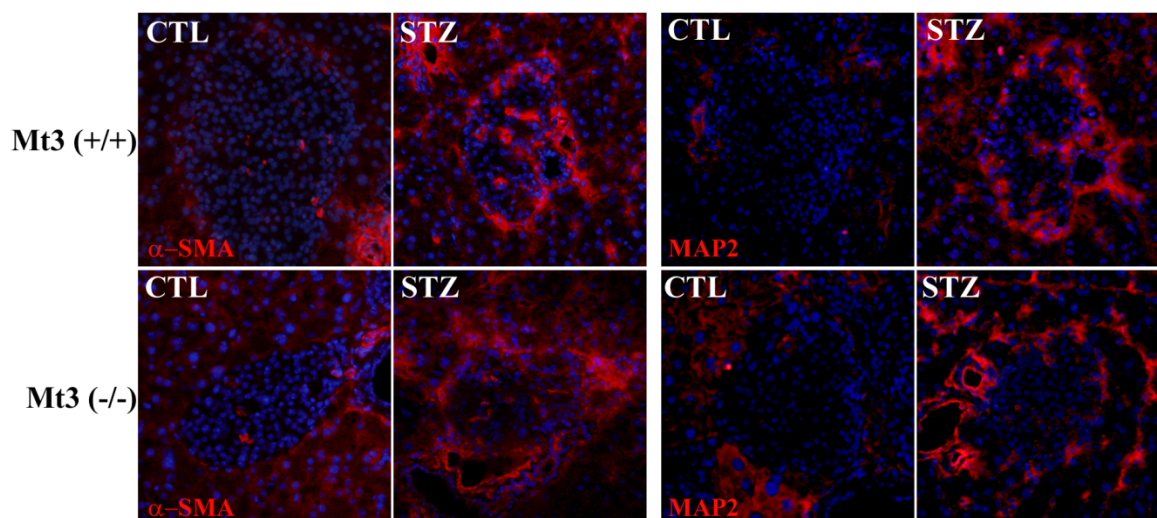

**Supplementary 1. Neuronal and vascular cells in islets of STZ-injected WT and Mt3-null mice**

Photomicrographs of islets from WT and Mt3-null mice injected with saline or STZ, and immunostained with anti-MAP2 or anti-alpha SMA antibodies. STZ increased the neuronal marker (MAP-2) and vascular marker (alpha SMA) in and around islets. The islets of WT and Mt3-null mice did not show any significant difference in their gross morphology after STZ injection.
